# Supplementary material for: Oncoprotein E6 as a Diagnostic Marker in Human Papillomavirus-Associated Cervical Cancer Screening
Source: Research Square preprint supplement (doi:10.21203/rs.3.rs-8093024/v1), 2025-12-03
Supplement: Supplementary file 1 [file 7c22ba79841d45b8b7d84655.docx]

## **Supplementary file 1: Data Abstraction tool for Onco E6 Cervical Cancer Screening Study**

| **Data Abstraction tool for Onco E6 Cervical Cancer Screening study** | | | | | | |
| --- | --- | --- | --- | --- | --- | --- |
| 1. **Data Abstraction tool for Onco E6** | | | | | | |
| Region: ___________ _________ Zone/: ___________ __Town: __________Woreda: __________________  Name of Health facility: ___________ _________ _________________________  Type of Health facility: 1. □ Hospital 2. □ HC  Date Chart abstraction conducted: ____/_____ /________  Client Name: ___________________________________________  Client Code: _________________________  ________ | | | | | | |
| Data collectors and supervisors | | | | | | |
| Name of data collector | | Telephone Address | | Email Address | | |
|  | |  | |  | | |
| Name of supervisor | | Telephone Address | | Email Address | | |
|  | |  | |  | | |
| **Part I. Socio demographic data ( 25 – 60 years )** | | | | | | |
| **SN** | **Question** | **Response** | | | **Data source** | |
| 1 | Age |  | | | Cervical cancer intake form | |
| 2 | Marital Status | 1. □ Unmarried | | |
| 2. □ Married | | |
| 3. □ Divorced | | |
| 4. □ Widowed | | |
| 3 | Educational status | 1. □ No education | | | Cervical cancer intake form | |
| 2. □ Primary | | |
| 3. □ Secondary | | |
| 4. □ Tertiary | | |
| 5. □ Other specify: | | |
| 4 | Address of client | Region_ | | | Cervical cancer intake form | |
|  |  | Zone/ SC | | |
|  |  | Woreda | | |
| **Part II. Reproductive and risk factor related data** | | | | | | |
| 5 | Menstrual History | | 1. □ Regular | | | Cervical cancer intake form |
| 2. □ Irregular | | |
| 3. □ Menopause | | |
| 4. □ Post coital spotting /bleeding | | |
| 6 | Number of births (parity) | |  | | | Cervical cancer intake form, Cervical cancer register |
| 7 | Age at first intercourse | |  | | | Cervical cancer intake form |
| 8 | Number of sexual partners | |  | | |
| 9 | History of STI (self) | | 1. □ Yes | | |
| 2. □ No | | |
| 10 | History of STI (Partner) | | 1. □ Yes | | |
| 2. □ No | | |
| 11 | History of Smoking | | 1. □ Yes | | |
| 2. □ No | | |
| 12 | Abnormal previous screening result | | 1. □ Yes, if yes specify and also document treatment given previously | | |
| 2. □ No | | |
| 13 | History of corticosteroid drug use | | 1. □ Yes | | |
| 2.□ No | | |
| 2.□negative | | |
| 3 unknown | | |
| 15 | Type of screening visit | | 1. □ 1st time screening | | | Cervical cancer intake form, Cervical cancer register |
| 2. □ Re-screening after previous negative result | | |
| 3. □ Post treatment Re-screening | | |
| 16 | VIA test result (if done) | | 1. □ Negative | | | Cervical cancer intake form, and register |
| 2. □ Positive | | |
| 3. □ suspicious | | |
| 6. □ Other subtypes | | |
| 17 | Cytology (if done) | | 1. □ Unsatisfactory | | | Cervical cancer intake form, Cervical cancer register, EMR |
| 2. □ Normal | | |
| 3. □ Inflammation | | |
| 4. □ Low grade LSIL | | |
| 5. □ High grade HSIL | | |
| 6. □ Invasive cancer | | |
| 18 | Biopsy result | | Biopsy Result  1. □ Negative  2. □ CIN-1,  3. □ CIN-2,3  4. □ Carcinoma insitu  5. □ Invasive Cervical cancer  6. □ Others | | |
| 19 | Onco E6 result (at EPHI) | | 1 Negative  2 positive  3 other | | | Remark |
