# Supplementary material for: Oncoprotein E6 as a Diagnostic Marker in Human Papillomavirus-Associated Cervical Cancer Screening
Source: Research Square preprint supplement (doi:10.21203/rs.3.rs-8093024/v1), 2025-12-03
Supplement: Supplementary file 2 [file a8fc07e3b0fbedbf29a0b626.docx]

**Supplementary file 2: Sociodemographic,** **Gynaecological and Behavioral characteristics of study participants.**

| Variable categories | Frequency (N) | Percent (%) |
| --- | --- | --- |
| Age (n=291)  25 – 29  30 – 39  40 – 49  50 – 59  60+ | 12  55  65  109  50 | 4.1  18.9  22.3  37.5  17.2 |
| Marital status (n=303)  Unmarried  Married  Divorced  Widowed | 13  190  55  45 | 4.3  62.7  18.2  14.9 |
| Educational Status (n=300)  Can’t read or write  Primary  Secondary  Tertiary  Other | 124  50  59  64  3 | 41.3  16.7  19.7  21.3  1 |
| Menstrual History (n=301)  Regular  Irregular  Menopause  Post coital spotting /bleeding | 33  74  190  4 | 11  24.6  63.1  1.3 |
| Age at first intercourse (n=263)  10 ­-14 years  15 -19 years  20 – 24 years  25 – 29 years  30 – 34 years  35 – 40 years | 26  139  70  21  4  3 | 9.9  52.9  26.6  8  1.5  1.1 |
| Parity (n=294)  Nulliparous  One  Two  Three  Four  Five and above | 16  40  60  54  48  76 | 5.4  13.6  20.4  18.4  16.3  25.9 |
| Number of sexual partners (n=259)  One  Two and above | 120  139 | 46.3  53.7 |
| History of STI (self) (n=301)  Yes  No | 79  222 | 26.2  73.8 |
| History of STI (Partner) (n=298)  Yes  No | 63  235 | 21.1  78.9 |
| History of Smoking (n=277)  Yes  No | 5  272 | 1.8  98.2 |
| Biopsy result (n=303)  Normal  CIN1  CIN 2, 3  Carcinoma in situ  Invasive cancer | 39  158  56  11  39 | 12.9  52.1  18.5  3.6  12.9 |
